# Supplementary material for: SKLB-677, an FLT3 and Wnt/β-catenin signaling inhibitor, displays potent activity in models of FLT3-driven AML
Source: PubMed Central journal article supplement (PMC4620497; doi:10.1038/srep15646), 2015-10-26
Supplement: srep15646-s1.pdf [file srep15646-s1.pdf]

**SKLB-677, an FLT3 and Wnt/ $\beta$ -catenin signaling inhibitor, displays potent activity in models of FLT3-driven AML**

Shuang Ma<sup>1,+</sup>, Ling-Ling Yang<sup>1,+</sup>, Ting Niu<sup>1,2,+</sup>, Chuan Cheng<sup>1</sup>, Lei Zhong<sup>1</sup>,  
Ming-Wu Zheng<sup>1</sup>, Yu Xiong<sup>1</sup>, Lin-Li Li<sup>1</sup>, Rong Xiang<sup>3</sup>, Li-Juan Chen<sup>1</sup>, Qiao Zhou<sup>1</sup>,  
Yu-Quan Wei<sup>1</sup>, and Sheng-Yong Yang<sup>1,\*</sup>

<sup>1</sup>State Key Laboratory of Biotherapy and Cancer Center, West China Hospital,  
Sichuan University/Collaborative Innovation Center of Biotherapy, Chengdu, 610041,  
China

<sup>2</sup>Department of Hematology & Research Laboratory of Hematology, West China  
Hospital, Sichuan University, Chengdu, 610041, China

<sup>3</sup>Department of Clinical Medicine, School of Medicine, Nankai University, Tianjin,  
300071, China

+these authors contributed equally to this work.

\*corresponding author: Dr. Sheng-Yong Yang, Address: State Key Laboratory of  
Biotherapy and Cancer Center, West China Hospital, Sichuan  
University/Collaborative Innovation Center of Biotherapy, Chengdu, Sichuan, 610041,  
P. R. China; Phone: 86-28-85164063; Fax: 86-28-85164060; Email:  
yangsy@scu.edu.cn

## **Supplementary Material and Methods**

### **Chemistry**

Unless otherwise noted, all starting materials, reagents, and solvents were purchased from commercial vendors and used as supplied without further purification. Reactions were monitored by thin layer chromatography (TLC) on Merck silica gel 60 F-254 thin layer plates. <sup>1</sup>H NMR and <sup>13</sup>C NMR spectra were recorded on a Bruker AV-400 spectrometer at 400 MHz and 100 MHz, respectively. Chemical shifts (δ) are expressed in parts per million (ppm) relative to tetramethylsilane (TMS) as an internal standard. The following abbreviations are used to designate multiplicities: s, singlet; d, doublet; t, triplet; q, quartet; m, multiplet; dd, double-doublet; brs, broad signal. Low-resolution and high-resolution mass spectral (MS) data were determined on an Agilent 1100 Series LCMS with UV detection at 254nm in low-resonance electrospray mode (ESI). All final compounds were purified to >95% purity, as determined by high-performance liquid chromatography (HPLC). HPLC analysis was performed on a Waters 2695 HPLC system equipped with a Kromasil C18 column (4.6mm × 250mm, 5μm).

### **Isolation of SP cells in cultured KG-1 cells and primary AML cells**

KG-1 cells and primary AML cells were plated in 6-well plates and incubated at 37°C 5% CO<sub>2</sub> overnight, followed by treatment with SKLB-677 for 48h. Then, the cells were harvested, and stained with Hoechst 33342 (Beyotime) at a final concentration of 5μg/ml without washing. The cells were mixed by gentle inversion and incubated in a 37°C water bath for 90min. After 90min, the cells were centrifuged at 4°C and resuspended in ice-cold HBSS (containing 2μg/ml PI (Sigma)). SP cells

were detected using BD FACSAriaIII flow cytometer.

### **Isolation of murine Bone Marrow (BM) cells.**

Balb/c mice were grouped to 4 groups (4 female mice and 4 male mice per group) and orally treated with 0, 1, 3, and 10mg/kg/d SKLB-677 for 21 days. For the isolation of total BM, mice were sacrificed at the last time point, and the tibias and femurs were removed. BM cells were washed out with RPMI-1640 medium, filtered through a 100- $\mu$ m cell strainer and centrifuged for 5min. Subsequently, the cell pellet was resuspended in 1ml ACK Lysis Buffer (Beyotime) and incubated for 5min at room temperature to allow lysis of red blood cells. Then, cells were washed in PBS and HSCs were analyzed.

### **Detection of HSCs by flow cytometry**

BM cells were incubated with antibodies of Lineage-APC (CD3e, CD11b, CD45R/B220, Ly-76, Ly-6G, Ly-6C), Sca-1-PE and c-Kit-FITC in 4°C for 30min. All the antibodies were purchased from Becton Dickinson. After the incubation, the cells were then washed twice with PBS and analyzed on a BD LSR II flow cytometer. FACS data were analyzed with FlowJo software.

## Chemistry of SKLB-677

### Supplementary Scheme S1<sup>a</sup>

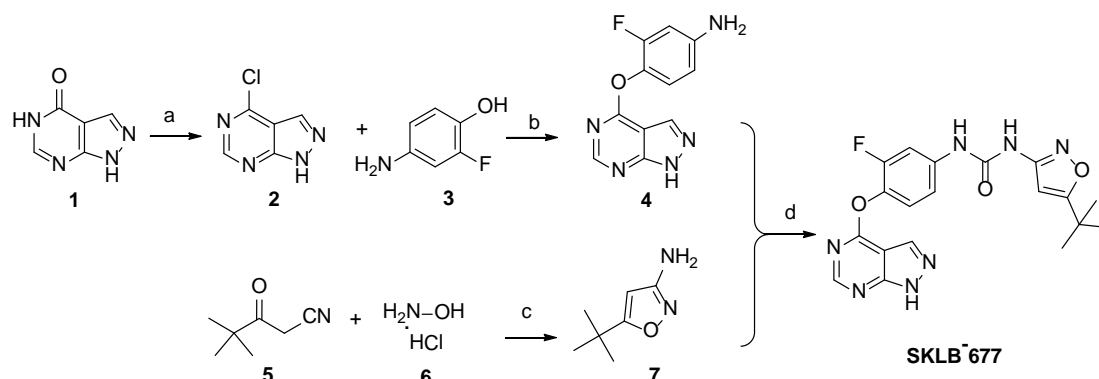

<sup>a</sup> Reagents and conditions: (a) phosphorus oxychloride, ethyldiisopropylamine, toluene, reflux, 56%; (b) 4-amino-2-fluorophenol, sodium hydroxide, H<sub>2</sub>O, tetrahydrofuran, 25°C -60°C, 41%; (c) NaOH, H<sub>2</sub>O, HCl, 25°C -55°C, 38%; (d) Acetonitrile, toluene, 110°C, 16h, 89%.

Synthetic routes for the target compound SKLB-677 are depicted in Supplementary Scheme S1. Commercially available compound 1H-pyrazolo[3,4-d]pyrimidin-4(5H)-one (**1**) reacted with phosphorus oxychloride to produce the intermediate 4-chloro-1H-pyrazolo[3,4-d]pyrimidine (**2**). Sodium hydroxide (0.20g, 5.0mmol) was added to a solution of 4-amino-2-fluorophenol (**3**, 0.64g, 5.0mmol) in H<sub>2</sub>O (10ml). The mixture was stirred at room temperature for 0.5h. Then, 4-chloro-1H-pyrazolo[3,4-d]pyrimidine (**2**, 0.77g, 5.0mmol) in tetrahydrofuran (20ml) was slowly added and the reaction mixture was heated to 60°C for 1.5h. The solvent was partially evaporated on a rotary evaporator. The crude mixture was extracted with ethyl acetate (2×120ml) and water. The combined organic layers were dried over MgSO<sub>4</sub> and concentrated. The obtained residue was purified by column chromatography (eluent gradient dichloromethane: methanol, 80:1) without final recrystallization to give 4-(1H-pyrazolo[3,4-d]pyrimidin-4-yloxy)-3-fluoroaniline (**4**, 0.502g, 41%) as a brown solid.

The intermediate compound 5-Tert-butylisoxazol-3-amine (**7**) was prepared by initial attack of the hydroxylamine nitrogen on the cyano group of the 4,4-dimethyl-3-oxopentanenitrile (**5**) at pH 7-8 at 55°C, followed by ring closure under acidic conditions (pH 3-4) at 55°C (Yield: 38%).

A solution of 5-tert-butylisoxazol-3-amine (**7**, 0.70g, 5.0mmol) dissolved in tetrahydrofuran (30ml) was slowly dripped into a stirred solution of triphosgene (1.49g, 5.0mmol) in tetrahydrofuran (5ml) using a constant pressure dropping funnel. Triethylamine (1.5ml, 10.5mmol) was then added slowly to the reaction mixture after the aniline was completely added. After evaporation of the solvent, the residue was dissolved in acetonitrile (20ml) and toluene (40ml), and compound **4** (1.10g, 4.5mmol) was added. Next, the reaction mixture was stirred at 110°C overnight, and the solvent was removed *in vacuo*. The residue obtained was purified by column chromatography (eluent gradient petroleum ether: ethyl acetate, 3:1) and recrystallized from ethyl acetate and petroleum ether to provide the final product SKLB-677. Yield: 89%, 99% HPLC purity. <sup>1</sup>H NMR (400 MHz, DMSO-*d*<sub>6</sub>): δ 14.27 (s, 1H), 9.63 (s, 1H), 9.13 (s, 1H), 8.51 (s, 1H), 8.29 (s, 1H), 7.67 (d, *J*=10.4 Hz, 1H), 7.41 (t, *J*=8.8 Hz, 1H), 7.23 (d, *J*=8.8 Hz, 1H), 6.50 (s, 1H) 1.30 (s, 9H) ppm; <sup>13</sup>C NMR (100 MHz, DMSO-*d*<sub>6</sub>): δ 180.3, 162.1, 158.2, 156.7, 154.8, 152.3, 151.3, 138.2, 133.3, 131.7, 124.3, 114.8, 106.8, 100.9, 92.5, 32.4, 28.3 ppm; LCMS *m/z*: 412.2 [M + H]; 99% HPLC purity.

## Supplementary Figures and Legends

### Supplementary Figure S1.

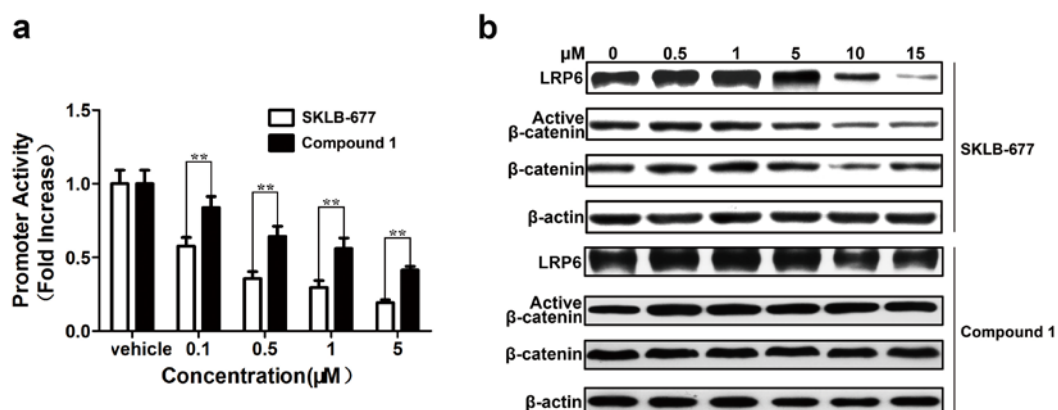

**Supplementary Figure S1.** A comparison of the inhibitory activity against Wnt/ $\beta$ -catenin pathway between SKLB-677 and compound **1**. a, STF3a cells were treated with SKLB-677 and/or compound **1** for 24h, followed by the detection of luciferase activity as mentioned in the text. Experiments were performed in triplicate, and the error bars indicate the SD values. \*\*  $P < 0.01$ . b, STF3a cells were treated with SKLB-677 and/or compound **1** for 24h, and the protein level of Wnt/ $\beta$ -catenin associated proteins was detected using specific antibodies.

## Supplementary Figure S2

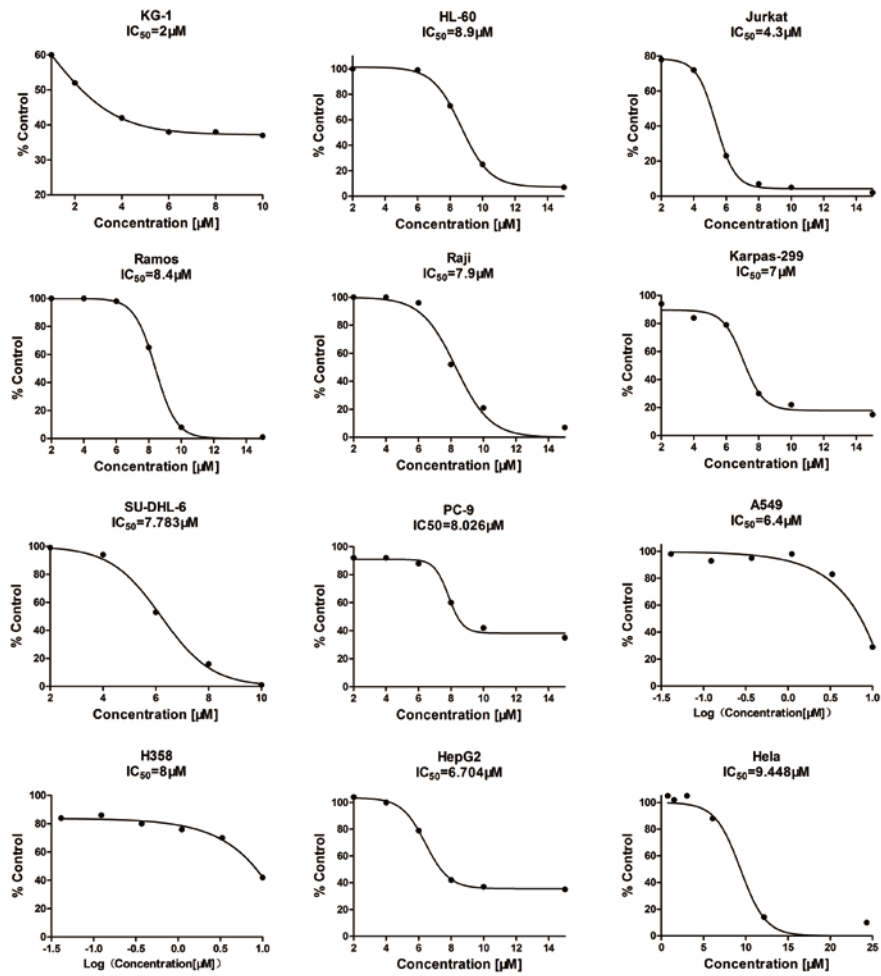

**Supplementary Figure S2.** The dose-response curves for various tumor cell lines treated with SKLB-677. Cells were treated with indicated concentration of SKLB-677 for 72h, followed by the conduction of MTT assays.

### Supplementary Figure S3.

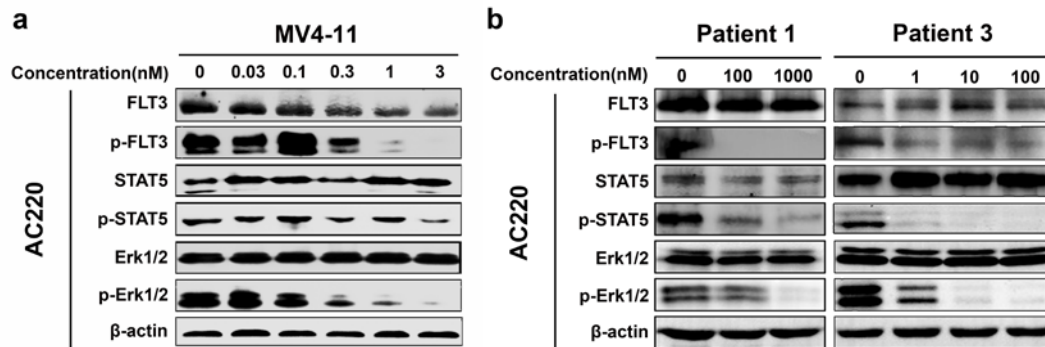

**Supplementary Figure S3.** a, MV4-11 cells was treated with various concentration of AC220 or 0.1%DMSO for 1h. The phosphorylated and un-phosphorylated FLT3 and its downstream signal proteins were assessed.  $\beta$ -actin was used as a loading control. b, Primary cells isolated from AML patients (sample #1, #3: FLT3-ITD positive) were treated with various concentrations of AC220 or 0.1%DMSO for 6h. The phosphorylated and un-phosphorylated FLT3 and its downstream signal proteins were detected using western blotting assays.



## Supplementary Figure S4

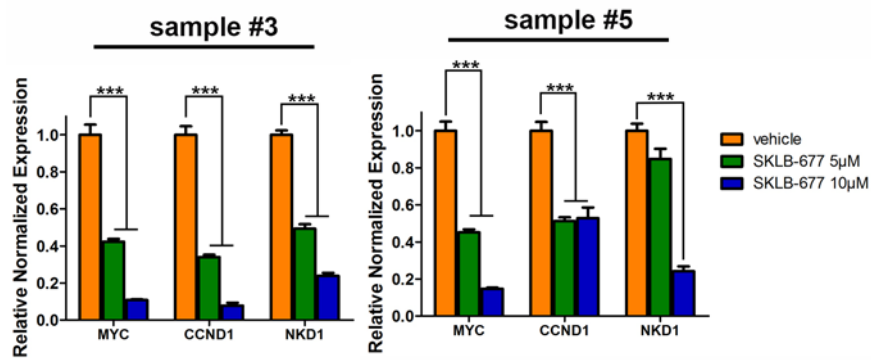

**Supplementary Figure S4.** The real-time qPCR assays in primary AML cells.

Primary AML PBMCs were treated with indicated concentrations of SKLB-677 for 6h. The mRNA expression levels of  $\beta$ -catenin target genes MYC, CCND1 and NKD1 were determined through real-time qPCR analysis. All samples were normalized to the level of GAPDH (mean  $\pm$ SEM from triplicate reactions). \*\*\* P<0.005.

**Supplementary Figure S5.**

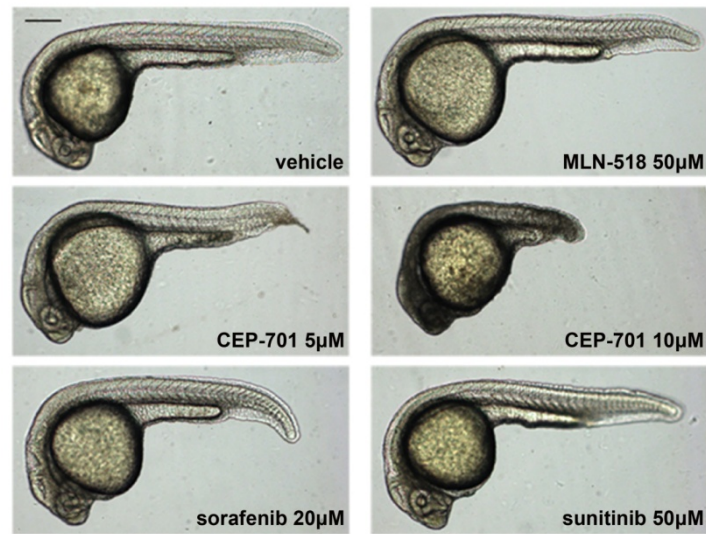

**Supplementary Figure S5.** Zebrafish development experiments were used to examine the effect of the first-generation FLT3 inhibitors including CEP-701, MLN-518, sorafenib, and sunitinib on the Wnt/ $\beta$ -catenin signaling. CEP-701, MLN-518, sorafenib, or sunitinib was added to the fish water at 4hpf (more than 10 zebrafish embryos in each group). The representative images were taken after 24hpf. CEP-701 caused severe malformation and development delay. Scale bar, 200µm.

## Supplementary Figure S6

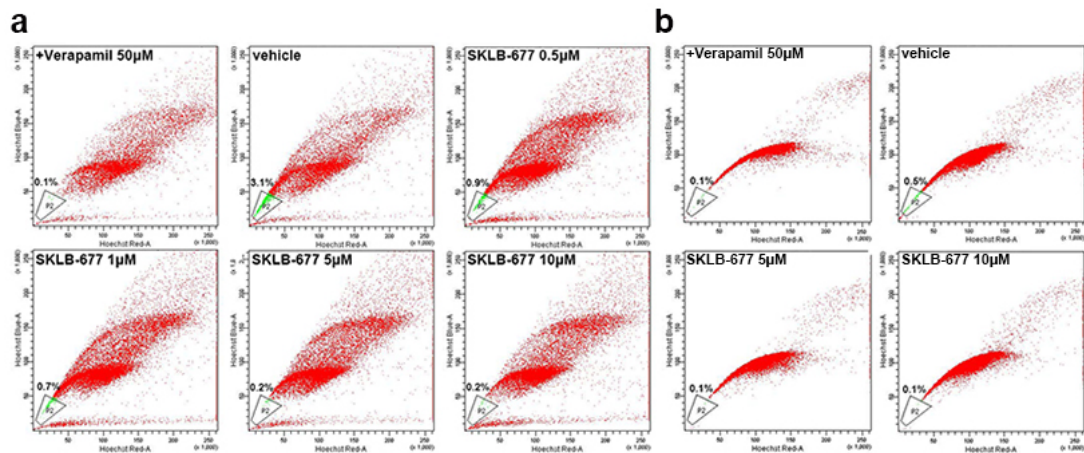

**Supplementary Figure S6.** Side population (SP) cell assays in cultured KG-1 cells and primary AML cells. a, KG-1 cells were incubated with SKLB-677 for 48h and stained with Hoechst 33342. The ratio of SP cells was 3.1% (as boxed) in the vehicle group, and this ratio was reduced when the cells were co-treated with 50 $\mu$ M verapamil. b, Primary AML PBMCs were isolated from peripheral blood using the standard protocol and incubated with SKLB-677 for 48h, following by the staining with Hoechst 33342. 50 $\mu$ M verapamil was used as a positive control.

**Supplementary Figure S7.**

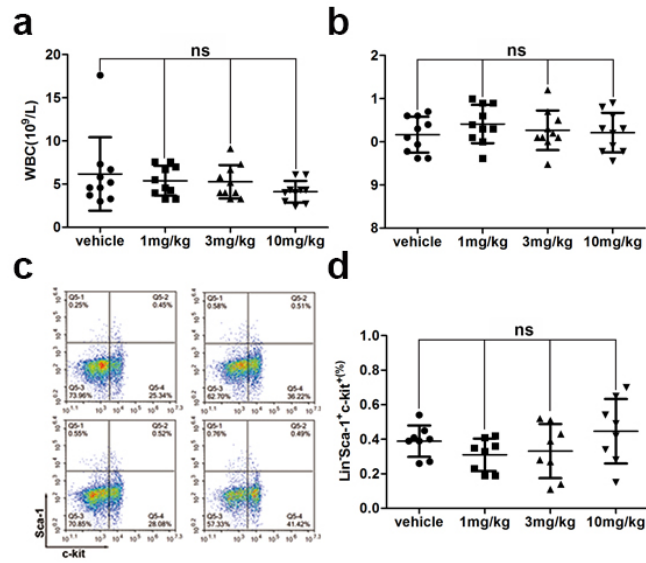

**Supplementary Figure S7.** The influence of SKLB-677 on mouse normal HSC and blood cells (8 mice in each group). a, b, The mice were orally treated with indicated concentrations of SKLB-677 for 21d, and then WBC and RBC were counted using a blood analyzer instrument. ns, not statistically significant. c, The mice were orally treated with indicated doses of SKLB-677 for 21d, and the blood marrow cells were collected for the detection of HSC (immunophenotypically characterized as Lineage-Sca-1+c-Kit+, LSK) population using corresponding antibodies. d, The statistical data of HSC numbers. ns, not statistically significant.

### Supplementary Figure S8

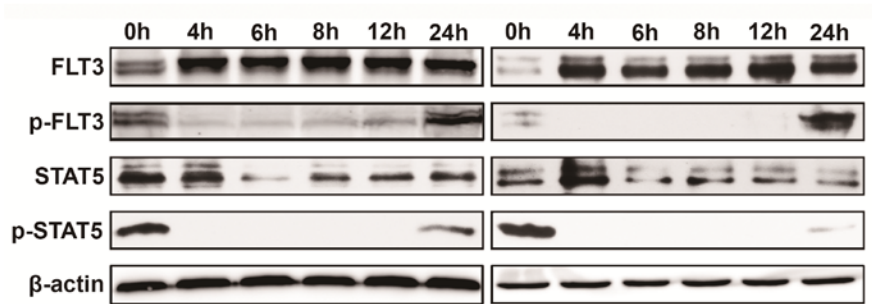

**Supplementary Figure S8.** NOD-SCID mice carrying established MV4-11 tumor xenografts were given a single oral dose of SKLB-677 (10mg/kg) or vehicle control. Tumors were harvested at the indicated time points, and the FLT3 signaling pathway was detected using western blot assays. Each lane is for one mouse. The experiments were performed on three mouse groups. Results for one group are shown in Fig. 5c, and those for the other two groups are shown here.

**Supplementary Figure S9.**

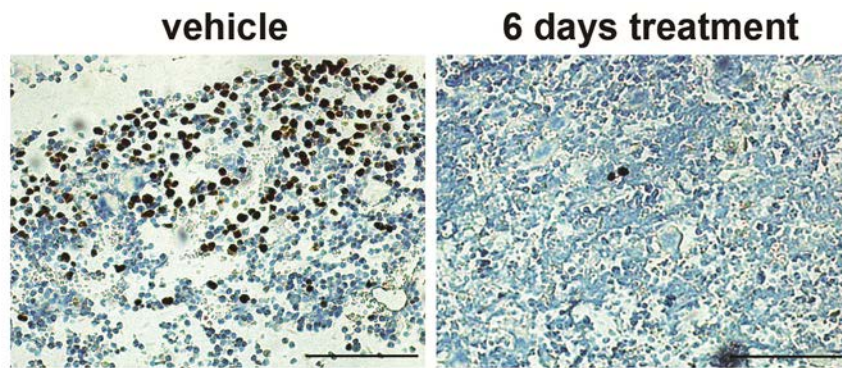

**Supplementary Figure S9.** NOD-SCID mice were intravenously injected with  $8 \times 10^6$  MV4-11 cells per mouse via the tail vein. Oral administration of SKLB-677 at 10 mg/kg/d was initiated on day 21 after the inoculation. Mouse (3 mice per group) thigh femurs were collected for immunohistochemical Ki67 analysis after 6 days of SKLB-677 treatment. The data proved that SKLB-677 significantly induced the regression of bone marrow tumor. Scale bar, 100 $\mu$ m.

## Supplementary Tables

### A comparison between SKLB-677 and compound 1.

SKLB-677 and compound 1 are analogues, and SKLB-677 was derived from compound 1. They have very similar spectrum of activity in enzymatic and cellular levels. Both of them have the ability to inhibit Wnt/ $\beta$ -catenin signaling. However, in terms of the potency, SKLB-677 is much more potent than compound 1.

### Supplementary Table S1. Kinase inhibition profiles for SKLB-677 and compound 1.

| <b>Kinase</b>  | <b>SKLB-677<br/>(Kd, <math>\mu</math>M)</b> | <b>Compound 1<br/>(IC<sub>50</sub>, <math>\mu</math>M)</b> |
|----------------|---------------------------------------------|------------------------------------------------------------|
| FLT3           | 0.00074                                     | 0.039                                                      |
| VEGFR2         | 0.011                                       | 0.012                                                      |
| PDGFR $\alpha$ | 0.012                                       | 0.223                                                      |
| PDGFR $\beta$  | 0.0027                                      | 0.408                                                      |
| KIT            | 0.0031                                      | 0.507                                                      |
| ERBB2          | >10                                         | >10                                                        |
| ERBB4          | >10                                         | >10                                                        |
| CDK2           | >10                                         | >10                                                        |
| CHEK1          | >10                                         | >10                                                        |
| CAMK4          | >10                                         | >10                                                        |
| DLK            | >10                                         | >10                                                        |
| DMPK           | >10                                         | >10                                                        |
| ERN1           | >10                                         | >10                                                        |
| IGF1R          | >10                                         | >10                                                        |
| PAK1           | >10                                         | >10                                                        |
| PAK2           | >10                                         | >10                                                        |
| PAK4           | >10                                         | >10                                                        |
| ERK            | >10                                         | >10                                                        |
| LCK            | 0.13                                        | >10                                                        |

**Supplementary Table S2.** Cell viability inhibition profiles for SKLB-677 and

Compound 1.

| <b>Tumor Type</b> | <b>Cell Line</b> | <b>SKLB-677<br/>(IC<sub>50</sub>, <math>\mu</math>M)</b> | <b>Compound 1<br/>(IC<sub>50</sub>, <math>\mu</math>M)</b> |
|-------------------|------------------|----------------------------------------------------------|------------------------------------------------------------|
| Leukemia, AML     | MV4-11           | 0.000079                                                 | 0.004                                                      |
| Leukemia, ALL     | Jurkat           | 4.3                                                      | 8.72                                                       |
| Leukemia, APL     | HL60             | 8.9                                                      | >10                                                        |
| Cervical Cancer   | Hela             | 9.448                                                    | >10                                                        |
| Breast Cancer     | MCF-7            | >10                                                      | >10                                                        |
| Liver Cancer      | BEL7402          | >10                                                      | >10                                                        |
| Liver Cancer      | SMMC7721         | >10                                                      | >10                                                        |
| Lung Cancer       | A549             | 6.4                                                      | >10                                                        |
| Lymphoma          | Raji             | 7.9                                                      | >10                                                        |
| Lymphoma          | Karpas-299       | 7                                                        | >10                                                        |
| Multiple myeloma  | U266             | >10                                                      | >10                                                        |



**Supplementary Table S3.** Matrix of compound screen for SKLB-677 obtained through service provided by DiscoverRX. The compound was screened at a concentration of 10 $\mu$ M. Results are given in %control.

| <b>KINOMEScan Gene Symbol</b> | <b>Entrez Gene Symbol</b> | <b>Percent Control(%)</b> | <b>Compound Concentration (<math>\mu</math>M)</b> |
|-------------------------------|---------------------------|---------------------------|---------------------------------------------------|
| AAK1                          | AAK1                      | 72                        | 10                                                |
| ABL1(E255K)-phosphorylated    | ABL1                      | 11                        | 10                                                |
| ABL1(F317I)-nonphosphorylated | ABL1                      | 2.2                       | 10                                                |
| ABL1(F317I)-phosphorylated    | ABL1                      | 43                        | 10                                                |
| ABL1(F317L)-nonphosphorylated | ABL1                      | 10                        | 10                                                |
| ABL1(F317L)-phosphorylated    | ABL1                      | 13                        | 10                                                |
| ABL1(H396P)-nonphosphorylated | ABL1                      | 5.8                       | 10                                                |
| ABL1(H396P)-phosphorylated    | ABL1                      | 11                        | 10                                                |
| ABL1(M351T)-phosphorylated    | ABL1                      | 5.6                       | 10                                                |
| ABL1(Q252H)-nonphosphorylated | ABL1                      | 5.2                       | 10                                                |
| ABL1(Q252H)-phosphorylated    | ABL1                      | 21                        | 10                                                |
| ABL1(T315I)-nonphosphorylated | ABL1                      | 3                         | 10                                                |
| ABL1(T315I)-phosphorylated    | ABL1                      | 3.3                       | 10                                                |
| ABL1(Y253F)-phosphorylated    | ABL1                      | 10                        | 10                                                |
| ABL1-nonphosphorylated        | ABL1                      | 1.2                       | 10                                                |
| ABL1-phosphorylated           | ABL1                      | 3.2                       | 10                                                |
| ABL2                          | ABL2                      | 13                        | 10                                                |
| ACVR1                         | ACVR1                     | 95                        | 10                                                |
| ACVR1B                        | ACVR1B                    | 100                       | 10                                                |
| ACVR2A                        | ACVR2A                    | 100                       | 10                                                |
| ACVR2B                        | ACVR2B                    | 81                        | 10                                                |
| ACVRL1                        | ACVRL1                    | 91                        | 10                                                |
| ADCK3                         | CABC1                     | 100                       | 10                                                |
| ADCK4                         | ADCK4                     | 100                       | 10                                                |
| AKT1                          | AKT1                      | 100                       | 10                                                |
| AKT2                          | AKT2                      | 100                       | 10                                                |
| AKT3                          | AKT3                      | 100                       | 10                                                |
| ALK                           | ALK                       | 4.8                       | 10                                                |
| ALK(C1156Y)                   | ALK                       | 17                        | 10                                                |
| ALK(L1196M)                   | ALK                       | 71                        | 10                                                |
| AMPK-alpha1                   | PRKAA1                    | 3                         | 10                                                |
| AMPK-alpha2                   | PRKAA2                    | 7.8                       | 10                                                |
| ANKK1                         | ANKK1                     | 57                        | 10                                                |

|               |        |      |    |
|---------------|--------|------|----|
| ARK5          | NUAK1  | 47   | 10 |
| ASK1          | MAP3K5 | 57   | 10 |
| ASK2          | MAP3K6 | 32   | 10 |
| AURKA         | AURKA  | 35   | 10 |
| AURKB         | AURKB  | 2.6  | 10 |
| AURKC         | AURKC  | 1.4  | 10 |
| AXL           | AXL    | 3.8  | 10 |
| BIKE          | BMP2K  | 89   | 10 |
| BLK           | BLK    | 0.95 | 10 |
| BMPR1A        | BMPR1A | 90   | 10 |
| BMPR1B        | BMPR1B | 88   | 10 |
| BMPR2         | BMPR2  | 14   | 10 |
| BMX           | BMX    | 73   | 10 |
| BRAF          | BRAF   | 2.7  | 10 |
| BRAF(V600E)   | BRAF   | 0.05 | 10 |
| BRK           | PTK6   | 23   | 10 |
| BRSK1         | BRSK1  | 85   | 10 |
| BRSK2         | BRSK2  | 76   | 10 |
| BTK           | BTK    | 100  | 10 |
| BUB1          | BUB1   | 66   | 10 |
| CAMK1         | CAMK1  | 21   | 10 |
| CAMK1D        | CAMK1D | 35   | 10 |
| CAMK1G        | CAMK1G | 48   | 10 |
| CAMK2A        | CAMK2A | 73   | 10 |
| CAMK2B        | CAMK2B | 77   | 10 |
| CAMK2D        | CAMK2D | 100  | 10 |
| CAMK2G        | CAMK2G | 66   | 10 |
| CAMK4         | CAMK4  | 85   | 10 |
| CAMKK1        | CAMKK1 | 4.4  | 10 |
| CAMKK2        | CAMKK2 | 30   | 10 |
| CASK          | CASK   | 59   | 10 |
| CDC2L1        | CDK11B | 66   | 10 |
| CDC2L2        | CDC2L2 | 53   | 10 |
| CDC2L5        | CDK13  | 0.6  | 10 |
| CDK11         | CDK19  | 0.1  | 10 |
| CDK2          | CDK2   | 1.6  | 10 |
| CDK3          | CDK3   | 0.2  | 10 |
| CDK4-cyclinD1 | CDK4   | 29   | 10 |
| CDK4-cyclinD3 | CDK4   | 4.8  | 10 |
| CDK5          | CDK5   | 4.2  | 10 |
| CDK7          | CDK7   | 3.1  | 10 |
| CDK8          | CDK8   | 3    | 10 |
| CDK9          | CDK9   | 5.6  | 10 |

|                     |          |      |    |
|---------------------|----------|------|----|
| CDKL1               | CDKL1    | 3.3  | 10 |
| CDKL2               | CDKL2    | 1.7  | 10 |
| CDKL3               | CDKL3    | 0.75 | 10 |
| CDKL5               | CDKL5    | 5    | 10 |
| CHEK1               | CHEK1    | 100  | 10 |
| CHEK2               | CHEK2    | 32   | 10 |
| CIT                 | CIT      | 16   | 10 |
| CLK1                | CLK1     | 5.8  | 10 |
| CLK2                | CLK2     | 6.4  | 10 |
| CLK3                | CLK3     | 52   | 10 |
| CLK4                | CLK4     | 9.6  | 10 |
| CSF1R               | CSF1R    | 0.3  | 10 |
| CSF1R-autoinhibited | CSF1R    | 0.1  | 10 |
| CSK                 | CSK      | 76   | 10 |
| CSNK1A1             | CSNK1A1  | 100  | 10 |
| CSNK1A1L            | CSNK1A1L | 68   | 10 |
| CSNK1D              | CSNK1D   | 44   | 10 |
| CSNK1E              | CSNK1E   | 31   | 10 |
| CSNK1G1             | CSNK1G1  | 86   | 10 |
| CSNK1G2             | CSNK1G2  | 26   | 10 |
| CSNK1G3             | CSNK1G3  | 70   | 10 |
| CSNK2A1             | CSNK2A1  | 100  | 10 |
| CSNK2A2             | CSNK2A2  | 71   | 10 |
| CTK                 | MATK     | 37   | 10 |
| DAPK1               | DAPK1    | 74   | 10 |
| DAPK2               | DAPK2    | 83   | 10 |
| DAPK3               | DAPK3    | 71   | 10 |
| DCAMKL1             | DCLK1    | 100  | 10 |
| DCAMKL2             | DCLK2    | 100  | 10 |
| DCAMKL3             | DCLK3    | 81   | 10 |
| DDR1                | DDR1     | 3.6  | 10 |
| DDR2                | DDR2     | 61   | 10 |
| DLK                 | MAP3K12  | 86   | 10 |
| DMPK                | DMPK     | 100  | 10 |
| DMPK2               | CDC42BPG | 50   | 10 |
| DRAK1               | STK17A   | 100  | 10 |
| DRAK2               | STK17B   | 78   | 10 |
| DYRK1A              | DYRK1A   | 80   | 10 |
| DYRK1B              | DYRK1B   | 41   | 10 |
| DYRK2               | DYRK2    | 34   | 10 |
| EGFR                | EGFR     | 29   | 10 |
| EGFR(E746-A750del)  | EGFR     | 37   | 10 |
| EGFR(G719C)         | EGFR     | 37   | 10 |

|                           |         |      |    |
|---------------------------|---------|------|----|
| EGFR(G719S)               | EGFR    | 47   | 10 |
| EGFR(L747-E749del, A750P) | EGFR    | 19   | 10 |
| EGFR(L747-S752del, P753S) | EGFR    | 38   | 10 |
| EGFR(L747-T751del,Sins)   | EGFR    | 61   | 10 |
| EGFR(L858R)               | EGFR    | 29   | 10 |
| EGFR(L858R,T790M)         | EGFR    | 75   | 10 |
| EGFR(L861Q)               | EGFR    | 46   | 10 |
| EGFR(S752-I759del)        | EGFR    | 38   | 10 |
| EGFR(T790M)               | EGFR    | 74   | 10 |
| EIF2AK1                   | EIF2AK1 | 96   | 10 |
| EPHA1                     | EPHA1   | 9.2  | 10 |
| EPHA2                     | EPHA2   | 1.2  | 10 |
| EPHA3                     | EPHA3   | 24   | 10 |
| EPHA4                     | EPHA4   | 4.8  | 10 |
| EPHA5                     | EPHA5   | 0.7  | 10 |
| EPHA6                     | EPHA6   | 0    | 10 |
| EPHA7                     | EPHA7   | 0    | 10 |
| EPHA8                     | EPHA8   | 0.1  | 10 |
| EPHB1                     | EPHB1   | 3.2  | 10 |
| EPHB2                     | EPHB2   | 5.2  | 10 |
| EPHB3                     | EPHB3   | 0.8  | 10 |
| EPHB4                     | EPHB4   | 1    | 10 |
| EPHB6                     | EPHB6   | 2    | 10 |
| ERBB2                     | ERBB2   | 100  | 10 |
| ERBB3                     | ERBB3   | 98   | 10 |
| ERBB4                     | ERBB4   | 81   | 10 |
| ERK1                      | MAPK3   | 76   | 10 |
| ERK2                      | MAPK1   | 100  | 10 |
| ERK3                      | MAPK6   | 79   | 10 |
| ERK4                      | MAPK4   | 98   | 10 |
| ERK5                      | MAPK7   | 70   | 10 |
| ERK8                      | MAPK15  | 0.8  | 10 |
| ERN1                      | ERN1    | 100  | 10 |
| FAK                       | PTK2    | 84   | 10 |
| FER                       | FER     | 24   | 10 |
| FES                       | FES     | 7.2  | 10 |
| FGFR1                     | FGFR1   | 1.4  | 10 |
| FGFR2                     | FGFR2   | 2    | 10 |
| FGFR3                     | FGFR3   | 12   | 10 |
| FGFR3(G697C)              | FGFR3   | 22   | 10 |
| FGFR4                     | FGFR4   | 4.8  | 10 |
| FGR                       | FGR     | 9.4  | 10 |
| FLT1                      | FLT1    | 0.05 | 10 |

|                              |         |      |    |
|------------------------------|---------|------|----|
| FLT3                         | FLT3    | 2    | 10 |
| FLT3(D835H)                  | FLT3    | 0    | 10 |
| FLT3(D835Y)                  | FLT3    | 3.2  | 10 |
| FLT3(ITD)                    | FLT3    | 0.05 | 10 |
| FLT3(K663Q)                  | FLT3    | 1.8  | 10 |
| FLT3(N841I)                  | FLT3    | 0    | 10 |
| FLT3(R834Q)                  | FLT3    | 2.8  | 10 |
| FLT3-autoinhibited           | FLT3    | 1.2  | 10 |
| FLT4                         | FLT4    | 0    | 10 |
| FRK                          | FRK     | 0    | 10 |
| FYN                          | FYN     | 15   | 10 |
| GAK                          | GAK     | 100  | 10 |
| GCN2(Kin.Dom.2,S808G)        | EIF2AK4 | 20   | 10 |
| GRK1                         | GRK1    | 97   | 10 |
| GRK4                         | GRK4    | 45   | 10 |
| GRK7                         | GRK7    | 87   | 10 |
| GSK3A                        | GSK3A   | 30   | 10 |
| GSK3B                        | GSK3B   | 96   | 10 |
| HASPIN                       | GSG2    | 42   | 10 |
| HCK                          | HCK     | 0.5  | 10 |
| HIPK1                        | HIPK1   | 68   | 10 |
| HIPK2                        | HIPK2   | 4.4  | 10 |
| HIPK3                        | HIPK3   | 1.2  | 10 |
| HIPK4                        | HIPK4   | 0.45 | 10 |
| HPK1                         | MAP4K1  | 13   | 10 |
| HUNK                         | HUNK    | 80   | 10 |
| ICK                          | ICK     | 42   | 10 |
| IGF1R                        | IGF1R   | 70   | 10 |
| IKK-alpha                    | CHUK    | 75   | 10 |
| IKK-beta                     | IKBKB   | 64   | 10 |
| IKK-epsilon                  | IKBKE   | 55   | 10 |
| INSR                         | INSR    | 87   | 10 |
| INSRR                        | INSRR   | 42   | 10 |
| IRAK1                        | IRAK1   | 2    | 10 |
| IRAK3                        | IRAK3   | 52   | 10 |
| IRAK4                        | IRAK4   | 100  | 10 |
| ITK                          | ITK     | 36   | 10 |
| JAK1(JH1domain-catalytic)    | JAK1    | 12   | 10 |
| JAK1(JH2domain-pseudokinase) | JAK1    | 74   | 10 |
| JAK2(JH1domain-catalytic)    | JAK2    | 31   | 10 |
| JAK3(JH1domain-catalytic)    | JAK3    | 14   | 10 |
| JNK1                         | MAPK8   | 52   | 10 |
| JNK2                         | MAPK9   | 2    | 10 |

|                   |          |     |    |
|-------------------|----------|-----|----|
| JNK3              | MAPK10   | 18  | 10 |
| KIT               | KIT      | 0   | 10 |
| KIT(A829P)        | KIT      | 15  | 10 |
| KIT(D816H)        | KIT      | 8.4 | 10 |
| KIT(D816V)        | KIT      | 0.2 | 10 |
| KIT(L576P)        | KIT      | 0   | 10 |
| KIT(V559D)        | KIT      | 0   | 10 |
| KIT(V559D,T670I)  | KIT      | 0.1 | 10 |
| KIT(V559D,V654A)  | KIT      | 1.8 | 10 |
| KIT-autoinhibited | KIT      | 1.1 | 10 |
| LATS1             | LATS1    | 47  | 10 |
| LATS2             | LATS2    | 26  | 10 |
| LCK               | LCK      | 0.3 | 10 |
| LIMK1             | LIMK1    | 25  | 10 |
| LIMK2             | LIMK2    | 7   | 10 |
| LKB1              | STK11    | 96  | 10 |
| LOK               | STK10    | 0   | 10 |
| LRRK2             | LRRK2    | 52  | 10 |
| LRRK2(G2019S)     | LRRK2    | 78  | 10 |
| LTK               | LTK      | 1.2 | 10 |
| LYN               | LYN      | 2   | 10 |
| LZK               | MAP3K13  | 93  | 10 |
| MAK               | MAK      | 21  | 10 |
| MAP3K1            | MAP3K1   | 36  | 10 |
| MAP3K15           | MAP3K15  | 100 | 10 |
| MAP3K2            | MAP3K2   | 100 | 10 |
| MAP3K3            | MAP3K3   | 100 | 10 |
| MAP3K4            | MAP3K4   | 69  | 10 |
| MAP4K2            | MAP4K2   | 28  | 10 |
| MAP4K3            | MAP4K3   | 3.2 | 10 |
| MAP4K4            | MAP4K4   | 0   | 10 |
| MAP4K5            | MAP4K5   | 2   | 10 |
| MAPKAPK2          | MAPKAPK2 | 100 | 10 |
| MAPKAPK5          | MAPKAPK5 | 97  | 10 |
| MARK1             | MARK1    | 78  | 10 |
| MARK2             | MARK2    | 98  | 10 |
| MARK3             | MARK3    | 68  | 10 |
| MARK4             | MARK4    | 70  | 10 |
| MAST1             | MAST1    | 100 | 10 |
| MEK1              | MAP2K1   | 7.2 | 10 |
| MEK2              | MAP2K2   | 5.9 | 10 |
| MEK3              | MAP2K3   | 63  | 10 |
| MEK4              | MAP2K4   | 39  | 10 |

|             |          |      |    |
|-------------|----------|------|----|
| MEK5        | MAP2K5   | 13   | 10 |
| MEK6        | MAP2K6   | 62   | 10 |
| MELK        | MELK     | 56   | 10 |
| MERTK       | MERTK    | 0    | 10 |
| MET         | MET      | 0.05 | 10 |
| MET(M1250T) | MET      | 2.2  | 10 |
| MET(Y1235D) | MET      | 5.4  | 10 |
| MINK        | MINK1    | 2.3  | 10 |
| MKK7        | MAP2K7   | 77   | 10 |
| MKNK1       | MKNK1    | 0.1  | 10 |
| MKNK2       | MKNK2    | 1    | 10 |
| MLCK        | MYLK3    | 58   | 10 |
| MLK1        | MAP3K9   | 42   | 10 |
| MLK2        | MAP3K10  | 99   | 10 |
| MLK3        | MAP3K11  | 24   | 10 |
| MRCKA       | CDC42BPA | 100  | 10 |
| MRCKB       | CDC42BPB | 90   | 10 |
| MST1        | STK4     | 28   | 10 |
| MST1R       | MST1R    | 42   | 10 |
| MST2        | STK3     | 87   | 10 |
| MST3        | STK24    | 46   | 10 |
| MST4        | MST4     | 24   | 10 |
| MTOR        | MTOR     | 100  | 10 |
| MUSK        | MUSK     | 0    | 10 |
| MYLK        | MYLK     | 40   | 10 |
| MYLK2       | MYLK2    | 72   | 10 |
| MYLK4       | MYLK4    | 78   | 10 |
| MYO3A       | MYO3A    | 11   | 10 |
| MYO3B       | MYO3B    | 17   | 10 |
| NDR1        | STK38    | 58   | 10 |
| NDR2        | STK38L   | 56   | 10 |
| NEK1        | NEK1     | 64   | 10 |
| NEK10       | NEK10    | 93   | 10 |
| NEK11       | NEK11    | 96   | 10 |
| NEK2        | NEK2     | 100  | 10 |
| NEK3        | NEK3     | 41   | 10 |
| NEK4        | NEK4     | 38   | 10 |
| NEK5        | NEK5     | 9.8  | 10 |
| NEK6        | NEK6     | 99   | 10 |
| NEK7        | NEK7     | 48   | 10 |
| NEK9        | NEK9     | 54   | 10 |
| NIK         | MAP3K14  | 90   | 10 |
| NIM1        | MGC42105 | 33   | 10 |

|                       |             |      |    |
|-----------------------|-------------|------|----|
| NLK                   | NLK         | 1.2  | 10 |
| OSR1                  | OXR1        | 36   | 10 |
| p38-alpha             | MAPK14      | 0    | 10 |
| p38-beta              | MAPK11      | 0.2  | 10 |
| p38-delta             | MAPK13      | 10   | 10 |
| p38-gamma             | MAPK12      | 3.7  | 10 |
| PAK1                  | PAK1        | 68   | 10 |
| PAK2                  | PAK2        | 79   | 10 |
| PAK3                  | PAK3        | 6.4  | 10 |
| PAK4                  | PAK4        | 100  | 10 |
| PAK6                  | PAK6        | 90   | 10 |
| PAK7                  | PAK7        | 100  | 10 |
| PCTK1                 | CDK16       | 0.2  | 10 |
| PCTK2                 | CDK17       | 0    | 10 |
| PCTK3                 | CDK18       | 0.05 | 10 |
| PDGFRA                | PDGFRA      | 0.25 | 10 |
| PDGFRB                | PDGFRB      | 0    | 10 |
| PDPK1                 | PDPK1       | 100  | 10 |
| PFCDPK1(P.falciparum) | CDPK1       | 26   | 10 |
| PFPK5(P.falciparum)   | MAL13P1.279 | 100  | 10 |
| PFTAIRE2              | CDK15       | 0.85 | 10 |
| PFTK1                 | CDK14       | 0.05 | 10 |
| PHKG1                 | PHKG1       | 85   | 10 |
| PHKG2                 | PHKG2       | 100  | 10 |
| PIK3C2B               | PIK3C2B     | 100  | 10 |
| PIK3C2G               | PIK3C2G     | 100  | 10 |
| PIK3CA                | PIK3CA      | 100  | 10 |
| PIK3CA(C420R)         | PIK3CA      | 96   | 10 |
| PIK3CA(E542K)         | PIK3CA      | 100  | 10 |
| PIK3CA(E545A)         | PIK3CA      | 86   | 10 |
| PIK3CA(E545K)         | PIK3CA      | 100  | 10 |
| PIK3CA(H1047L)        | PIK3CA      | 84   | 10 |
| PIK3CA(H1047Y)        | PIK3CA      | 100  | 10 |
| PIK3CA(I800L)         | PIK3CA      | 87   | 10 |
| PIK3CA(M1043I)        | PIK3CA      | 100  | 10 |
| PIK3CA(Q546K)         | PIK3CA      | 100  | 10 |
| PIK3CB                | PIK3CB      | 100  | 10 |
| PIK3CD                | PIK3CD      | 98   | 10 |
| PIK3CG                | PIK3CG      | 100  | 10 |
| PIK4CB                | PI4KB       | 52   | 10 |
| PIM1                  | PIM1        | 26   | 10 |
| PIM2                  | PIM2        | 37   | 10 |
| PIM3                  | PIM3        | 40   | 10 |



|                      |          |      |    |
|----------------------|----------|------|----|
| PIP5K1A              | PIP5K1A  | 22   | 10 |
| PIP5K1C              | PIP5K1C  | 51   | 10 |
| PIP5K2B              | PIP4K2B  | 98   | 10 |
| PIP5K2C              | PIP4K2C  | 100  | 10 |
| PKAC-alpha           | PRKACA   | 31   | 10 |
| PKAC-beta            | PRKACB   | 88   | 10 |
| PKMYT1               | PKMYT1   | 100  | 10 |
| PKN1                 | PKN1     | 82   | 10 |
| PKN2                 | PKN2     | 100  | 10 |
| PKNB(M.tuberculosis) | pknB     | 100  | 10 |
| PLK1                 | PLK1     | 35   | 10 |
| PLK2                 | PLK2     | 100  | 10 |
| PLK3                 | PLK3     | 100  | 10 |
| PLK4                 | PLK4     | 68   | 10 |
| PRKCD                | PRKCD    | 61   | 10 |
| PRKCE                | PRKCE    | 90   | 10 |
| PRKCH                | PRKCH    | 100  | 10 |
| PRKCI                | PRKCI    | 79   | 10 |
| PRKCQ                | PRKCQ    | 50   | 10 |
| PRKD1                | PRKD1    | 98   | 10 |
| PRKD2                | PRKD2    | 28   | 10 |
| PRKD3                | PRKD3    | 100  | 10 |
| PRKG1                | PRKG1    | 86   | 10 |
| PRKG2                | PRKG2    | 100  | 10 |
| PRKR                 | EIF2AK2  | 57   | 10 |
| PRKX                 | PRKX     | 44   | 10 |
| PRP4                 | PRPF4B   | 73   | 10 |
| PYK2                 | PTK2B    | 64   | 10 |
| QSK                  | KIAA0999 | 91   | 10 |
| RAF1                 | RAF1     | 3.5  | 10 |
| RET                  | RET      | 0.05 | 10 |
| RET(M918T)           | RET      | 0    | 10 |
| RET(V804L)           | RET      | 0    | 10 |
| RET(V804M)           | RET      | 1.9  | 10 |
| RIOK1                | RIOK1    | 89   | 10 |
| RIOK2                | RIOK2    | 88   | 10 |
| RIOK3                | RIOK3    | 100  | 10 |
| RIPK1                | RIPK1    | 31   | 10 |
| RIPK2                | RIPK2    | 0.75 | 10 |
| RIPK4                | RIPK4    | 0.85 | 10 |
| RIPK5                | DSTYK    | 98   | 10 |
| ROCK1                | ROCK1    | 100  | 10 |
| ROCK2                | ROCK2    | 66   | 10 |

|                               |         |      |    |
|-------------------------------|---------|------|----|
| ROS1                          | ROS1    | 0.1  | 10 |
| RPS6KA4(Kin.Dom.1-N-terminal) | RPS6KA4 | 29   | 10 |
| RPS6KA4(Kin.Dom.2-C-terminal) | RPS6KA4 | 78   | 10 |
| RPS6KA5(Kin.Dom.1-N-terminal) | RPS6KA5 | 66   | 10 |
| RPS6KA5(Kin.Dom.2-C-terminal) | RPS6KA5 | 100  | 10 |
| RSK1(Kin.Dom.1-N-terminal)    | RPS6KA1 | 100  | 10 |
| RSK1(Kin.Dom.2-C-terminal)    | RPS6KA1 | 94   | 10 |
| RSK2(Kin.Dom.1-N-terminal)    | RPS6KA3 | 35   | 10 |
| RSK2(Kin.Dom.2-C-terminal)    | RPS6KA3 | 100  | 10 |
| RSK3(Kin.Dom.1-N-terminal)    | RPS6KA2 | 41   | 10 |
| RSK3(Kin.Dom.2-C-terminal)    | RPS6KA2 | 19   | 10 |
| RSK4(Kin.Dom.1-N-terminal)    | RPS6KA6 | 64   | 10 |
| RSK4(Kin.Dom.2-C-terminal)    | RPS6KA6 | 72   | 10 |
| S6K1                          | RPS6KB1 | 54   | 10 |
| SBK1                          | SBK1    | 80   | 10 |
| SGK                           | SGK1    | 29   | 10 |
| SgK110                        | SgK110  | 100  | 10 |
| SGK2                          | SGK2    | 78   | 10 |
| SGK3                          | SGK3    | 46   | 10 |
| SIK                           | SIK1    | 97   | 10 |
| SIK2                          | SIK2    | 69   | 10 |
| SLK                           | SLK     | 0.2  | 10 |
| SNARK                         | NUAK2   | 66   | 10 |
| SNRK                          | SNRK    | 100  | 10 |
| SRC                           | SRC     | 9.2  | 10 |
| SRMS                          | SRMS    | 57   | 10 |
| SRPK1                         | SRPK1   | 96   | 10 |
| SRPK2                         | SRPK2   | 100  | 10 |
| SRPK3                         | SRPK3   | 71   | 10 |
| STK16                         | STK16   | 36   | 10 |
| STK33                         | STK33   | 0.05 | 10 |
| STK35                         | STK35   | 0.95 | 10 |
| STK36                         | STK36   | 97   | 10 |
| STK39                         | STK39   | 100  | 10 |
| SYK                           | SYK     | 25   | 10 |
| TAK1                          | MAP3K7  | 100  | 10 |
| TAOK1                         | TAOK1   | 3.2  | 10 |
| TAOK2                         | TAOK2   | 0.35 | 10 |
| TAOK3                         | TAOK3   | 0.55 | 10 |
| TBK1                          | TBK1    | 70   | 10 |
| TEC                           | TEC     | 100  | 10 |
| TESK1                         | TESK1   | 82   | 10 |
| TGFBR1                        | TGFBR1  | 100  | 10 |

|                              |        |      |    |
|------------------------------|--------|------|----|
| TGFBR2                       | TGFBR2 | 100  | 10 |
| TIE1                         | TIE1   | 8.7  | 10 |
| TIE2                         | TEK    | 0.2  | 10 |
| TLK1                         | TLK1   | 75   | 10 |
| TLK2                         | TLK2   | 64   | 10 |
| TNIK                         | TNIK   | 5.2  | 10 |
| TNK1                         | TNK1   | 2.2  | 10 |
| TNK2                         | TNK2   | 37   | 10 |
| TNNI3K                       | TNNI3K | 0    | 10 |
| TRKA                         | NTRK1  | 7.8  | 10 |
| TRKB                         | NTRK2  | 0.05 | 10 |
| TRKC                         | NTRK3  | 0.05 | 10 |
| TRPM6                        | TRPM6  | 89   | 10 |
| TSSK1B                       | TSSK1B | 100  | 10 |
| TTK                          | TTK    | 17   | 10 |
| TXK                          | TXK    | 88   | 10 |
| TYK2(JH1domain-catalytic)    | TYK2   | 44   | 10 |
| TYK2(JH2domain-pseudokinase) | TYK2   | 100  | 10 |
| TYRO3                        | TYRO3  | 0.35 | 10 |
| ULK1                         | ULK1   | 70   | 10 |
| ULK2                         | ULK2   | 97   | 10 |
| ULK3                         | ULK3   | 51   | 10 |
| VEGFR2                       | KDR    | 0.1  | 10 |
| VRK2                         | VRK2   | 100  | 10 |
| WEE1                         | WEE1   | 64   | 10 |
| WEE2                         | WEE2   | 78   | 10 |
| WNK1                         | WNK1   | 100  | 10 |
| WNK3                         | WNK3   | 100  | 10 |
| YANK1                        | STK32A | 88   | 10 |
| YANK2                        | STK32B | 50   | 10 |
| YANK3                        | STK32C | 97   | 10 |
| YES                          | YES1   | 27   | 10 |
| YSK1                         | STK25  | 35   | 10 |
| YSK4                         | YSK4   | 0.15 | 10 |
| ZAK                          | ZAK    | 1.5  | 10 |
| ZAP70                        | ZAP70  | 100  | 10 |

**Supplementary Table S4.** Selectivity scores for kinase inhibitors. The selectivity scores ( $S = \text{number of target hits} / \text{number of kinases screened}$ ) were calculated as previously described (see Karaman MW, et al. A quantitative analysis of kinase inhibitor selectivity. Nature biotechnology 2008; 26: 127-32) based on the data for distinct kinases excluding mutant variants. The value of  $S$  (100nM) of SKLB-677 was derived according to the data provided by DiscoverRX.

| <b>Inhibitor</b> | <b>S(3<math>\mu</math>M)</b> | <b>S(100nM)</b> |
|------------------|------------------------------|-----------------|
| SKLB-677         | ND                           | ~0.127          |
| AC220            | 0.067                        | 0.028           |
| CEP-701          | 0.81                         | 0.46            |
| MLN-518          | 0.056                        | 0.014           |
| Sorafenib        | 0.18                         | 0.045           |
| Sunitinib        | 0.58                         | 0.19            |
| Dasatinib        | 0.283                        | 0.159           |
| Erlotinib        | 0.152                        | 0.014           |
| Gefitinib        | 0.072                        | 0.007           |
| Imatinib         | 0.066                        | 0.031           |
| Lapatinib        | 0.010                        | 0.010           |

ND, not determined.

**Supplementary Table S5.** The characteristics of AML patients. Selected genes were detected.

| <b>Patient</b> | <b>Age(y)</b> | <b>Sex</b> | <b>AML Status</b>     | <b>Cytogenetic Status</b> | <b>Gene Mutation</b>                                 |
|----------------|---------------|------------|-----------------------|---------------------------|------------------------------------------------------|
| #1             | 32            | M          | Diagnosis, refractory | Normal                    | FLT3-ITD mutation, NPM1 mutation, HOX11 <sup>+</sup> |
| #2             | 15            | M          | Diagnosis, refractory | +8                        | FLT3-ITD mutation, WT1 mutation                      |
| #3             | 31            | F          | Newly diagnosed       | Normal                    | FLT3-ITD mutation                                    |
| #4             | 44            | M          | Newly diagnosed       | Normal                    | DNMT3A mutation, PHF2 mutation                       |
| #5             | 57            | M          | Newly diagnosed       | Normal                    | BCR-ABL <sup>+</sup>                                 |
| #6             | 22            | M          | Diagnosis, refractory | Normal                    | TIE2 mutation, ASXL1 mutation, EVI1 <sup>+</sup>     |

**Supplementary Table S6.** The pharmacokinetic characteristics of SKLB-677.

AUC<sub>(0-36h)</sub>: Mean area under the plasma concentration-time curve during 36h and

standard deviation. t<sub>1/2</sub>: Mean half-life associated with the terminal slope and standard

deviation. C<sub>max</sub>: Mean peak plasma concentration and standard deviation.

T<sub>max</sub>: Mean time to reach maximum plasma concentration and standard deviation. CL:

Mean body clearance and standard deviation. V<sub>ss</sub>: Mean volume of distribution at

steady state and standard deviation. The statistical analysis of data was shown as

mean values and SD values (n=6).

| Parameter                       | P.O.    |        | I.V.    |        |
|---------------------------------|---------|--------|---------|--------|
|                                 | Mean    | SD     | Mean    | SD     |
| AUC <sub>(0-36h)</sub> (mg/L×h) | 175.654 | 22.903 | 272.344 | 31.304 |
| t <sub>1/2</sub> (h)            | 5.433   | 1.318  | 5.091   | 0.471  |
| T <sub>max</sub> (h)            | 3       | 0.816  | 0.033   | 0      |
| CL (L/h/kg)                     | 0.058   | 0.007  | 0.037   | 0.004  |
| V <sub>ss</sub> (L/kg)          | 0.446   | 0.108  | 0.271   | 0.046  |
| C <sub>max</sub> (mg/L)         | 12.283  | 0.762  | 58.213  | 5.244  |

**Supplementary Table S7.** Primers used in the real time qPCR assays.

| <b>Genes</b> | <b>Forward primers (5'-3')</b> | <b>Reverse primers (5'-3')</b> |
|--------------|--------------------------------|--------------------------------|
| NKD1         | GTCAACCACTCCCAACATC            | AATGGTGGTAGCAGCCAGAC           |
| AXIN2        | GGGCCACTTTAAAGAGCAG            | CCTTCATACATCGGGAGCA            |
| MYC          | CGTCTCCACACATCAGCACAA          | TCTTGGCAGCAGGATAGTCCTT         |
| CCND1        | CCGTCCATGCGGAAGATC             | ATGGCCAGCGGGAAGAC              |
| GAPDH        | TGGAAGGACTCATGACCACA           | TTCAGCTCAGGGATGACCTT           |
